# Supplementary material for: Audio deepfakes: A survey
Source: Frontiers journal article supplement (doi:10.3389/fdata.2022.1001063), 2023-01-09
Supplement: Table_1.pdf [file Table_1.pdf]

Table 1. Quick guide for Audio Deepfake tools

| Type                          | Name                                        | Ref                                | Sample                                                                                                                                                    | Key Features                                                                                                                                                                                                                                                                                                                           |
|-------------------------------|---------------------------------------------|------------------------------------|-----------------------------------------------------------------------------------------------------------------------------------------------------------|----------------------------------------------------------------------------------------------------------------------------------------------------------------------------------------------------------------------------------------------------------------------------------------------------------------------------------------|
| Replay/<br>Detection          | Replay<br>attack<br>end-to-end<br>detection | (Tom<br>et al.<br>2018)            | <a href="https://mohitjaindr.github.io/pdfs/c20-interspeech-2018.pdf">https://mohitjaindr.github.io/pdfs/c20-interspeech-2018.pdf</a>                     | Contains a visual attention mechanism on time-frequency representations of speeches that uses group delay features and ResNet-18 architecture. The model works perfectly with an Equal Error Rate of 0 percent                                                                                                                         |
| Synthesis<br>TTS/<br>Creation | Char2Wav                                    | (Sotelo<br>et al.<br>2017)         | <a href="https://github.com/gcunhase/PaperNotes/blob/master/notes/.char2wav.md">https://github.com/gcunhase/PaperNotes/blob/master/notes/.char2wav.md</a> | Reader (frontend): Bidirectional RNN, transform the text into linguistic features” Neural vocoder (backend): Conditional SampleRNN: takes the linguistic features as input and creates the corresponding audio.                                                                                                                        |
| Synthesis<br>TTS/<br>Creation | Tacotron2                                   | (Shen<br>et al.<br>2018)           | <a href="https://github.com/NVIDIA/tacotron2">https://github.com/NVIDIA/tacotron2</a>                                                                     | End to end Text to Speech model that uses recurrent sequence-to-sequence feature prediction network (for Embedding characters to mel spectrograms) and a modified WaveNet.                                                                                                                                                             |
| Synthesis<br>TTS/<br>Creation | VoCo                                        | (Jin<br>et al.<br>2017)            | <a href="https://www.youtube.com/watch?v=RB7upq8nzIU">https://www.youtube.com/watch?v=RB7upq8nzIU</a>                                                     | Not open source. Includes text to speech and voice conversion of the text-based editing, pitch profile, manual editing of length and amplitude.                                                                                                                                                                                        |
| Synthesis<br>TTS/<br>Creation | WaveGlow                                    | (Prenger<br>et al.<br>2019)        | <a href="https://github.com/NVIDIA/waveglow">https://github.com/NVIDIA/waveglow</a>                                                                       | It combines insights from Glow and WaveNet to be able to provide fast, efficient and high-quality audio synthesis, without the need for auto-regression. It uses only a single network trained using only a single cost function: maximizing the likelihood of the training data, which makes the training procedure simple and stable |
| Synthesis<br>TTS/<br>Creation | Tacotron                                    | (Wang<br>et al.<br>2017)           | <a href="https://github.com/Kyubyong/tacotron">https://github.com/Kyubyong/tacotron</a>                                                                   | End to end text to speech model, creates audio directly from text.                                                                                                                                                                                                                                                                     |
| Synthesis<br>TTS/<br>Creation | MelNet                                      | (Vasquez<br>and<br>Lewis,<br>2019) | <a href="https://github.com/Deepest-Project/MelNet">https://github.com/Deepest-Project/MelNet</a>                                                         | It is introduced as a generative model for audio which can capture longer-range dependencies for the first time in the Text-to-Speech area. MelNet couples a fine-grained autoregressive model and a multiscale generation procedure to jointly capture local and global structure.                                                    |
| Synthesis<br>TTS/<br>Creation | Deep Voice<br>3                             | (Ping<br>et al.<br>2018)           | <a href="https://github.com/Kyubyong/deepvoice3">https://github.com/Kyubyong/deepvoice3</a>                                                               | A fully convolutional attention based neural for Text-to-Speech that can create high-quality audio samples.                                                                                                                                                                                                                            |
| Synthesis<br>TTS/<br>Creation | Wavenet                                     | (Oord<br>et al.<br>2016)           | <a href="https://github.com/ibab/tensorflow-wavenet">https://github.com/ibab/tensorflow-wavenet</a>                                                       | It uses Causal Convolutional layers and Dilated Causal Convolutional layers to create high quality audio deepfake.                                                                                                                                                                                                                     |

| Type                                    | Name                       | Ref                    | Sample                                                                                                                          | Key Features                                                                                                                                                                                                                                                                                                                 |
|-----------------------------------------|----------------------------|------------------------|---------------------------------------------------------------------------------------------------------------------------------|------------------------------------------------------------------------------------------------------------------------------------------------------------------------------------------------------------------------------------------------------------------------------------------------------------------------------|
| Synthesis TTS/Creation                  | GAN based Speech Synthesis | (Saito et al., 2018)   | <a href="https://github.com/r9y9/gantts">https://github.com/r9y9/gantts</a>                                                     | Statistical parametric method for speech synthesis based on GANs                                                                                                                                                                                                                                                             |
| Synthesis TTS/Creation                  | HiFi-GAN                   | (Kong et al., 2020)    | <a href="https://github.com/jik876/hifi-gan">https://github.com/jik876/hifi-gan</a>                                             | A GAN based speech synthesis framework which outperformed a lot of the previous works.                                                                                                                                                                                                                                       |
| Synthesis TTS/Creation                  | MelGAN                     | (Kumar et al., 2019)   | <a href="https://github.com/seungwonpark/melgan">https://github.com/seungwonpark/melgan</a>                                     | non-autoaggressive so fast, fully convolutional with significantly fewer parameters than the other frameworks.                                                                                                                                                                                                               |
| Voice Conversion/Impersonation/Creation | a GAN based model          | (Gao et al., 2018)     | Not Found                                                                                                                       | Transferring style from one speaker to another. Obtained from huge modifications on the DiscoGAN                                                                                                                                                                                                                             |
| Voice Conversion/Impersonation/Creation | CycleGAN-VC                | (Fang et al., 2018)    | <a href="https://github.com/jackaduma/CycleGAN-VC2">https://github.com/jackaduma/CycleGAN-VC2</a>                               | A VC system based on CycleGAN. A nonparallel VC method that only learns one-to-one-mappings                                                                                                                                                                                                                                  |
| Voice Conversion/Creation               | StarGAN-VC                 | (Kameoka et al., 2018) | <a href="https://github.com/liusongxiang/StarGAN-Voice-Conversion">https://github.com/liusongxiang/StarGAN-Voice-Conversion</a> | It has developed StarGAN (Choi et al., 2018) to a VC system that allows non-parallel many-to-many VC. There is a generator that takes an acoustic feature sequence instead of a single-frame acoustic feature as an input and outputs an acoustic feature sequence of the same length. (same as Kaneko et al. (2017) papers. |
| Voice Conversion/Impersonation/Creation | SINGAN                     | (Sisman et al., 2019)  | Not Found                                                                                                                       | GAN-based model for singing VC.                                                                                                                                                                                                                                                                                              |
| Voice Conversion/Creation               | ASSEM-VC                   | (Kim et al., 2022)     | <a href="https://github.com/mindslab-ai/assem-vc">https://github.com/mindslab-ai/assem-vc</a>                                   | Assembling TTS vocoders and achieved very good voice quality                                                                                                                                                                                                                                                                 |
| VC and TTS/Detection                    | -                          | (Chen et al., 2020a)   | Not found                                                                                                                       | Overcoming the generalization challenge by using: 1) large margin cosine loss function (LMCL) 2) online frequency masking augmentation that forces the neural network to learn more robust feature embeddings.                                                                                                               |
| VC and TTS/Detection                    | -                          | (Zhang et al., 2021b)  | <a href="https://github.com/yzyouzhang/AIR-ASVspoof">https://github.com/yzyouzhang/AIR-ASVspoof</a>                             | An attempt to detect unknown synthetic voice spoofing attacks using one-class learning. It compacts the bonafide speech representation and injects an angular margin to separate the spoofing attacks in the embedding space.                                                                                                |
| VC, TTS and Replay attack/Detection     | -                          | (Chen et al., 2017)    | Not found                                                                                                                       | Inspired by the success of ResNet in image recognition, they used it for automatic audio spoofing detection, and reduced the EER by 18 percent                                                                                                                                                                               |
