# Supplementary material for: Audio deepfakes: A survey
Source: Frontiers journal article supplement (doi:10.3389/fdata.2022.1001063), 2023-01-09
Supplement: Table_2.pdf [file Table_2.pdf]

Table 2. Summarization of the Audio Deepfake papers surveyed

| Name                               | Ref                | Architecture                                                                                                                                       | Dataset                                                                                                                                                                                                                                                                                                                                                             | Objectives                                                                                                       | Metrics                                                                 | Results                                                                                                                                                                                                                                                                                                                                                                                                                                                  |
|------------------------------------|--------------------|----------------------------------------------------------------------------------------------------------------------------------------------------|---------------------------------------------------------------------------------------------------------------------------------------------------------------------------------------------------------------------------------------------------------------------------------------------------------------------------------------------------------------------|------------------------------------------------------------------------------------------------------------------|-------------------------------------------------------------------------|----------------------------------------------------------------------------------------------------------------------------------------------------------------------------------------------------------------------------------------------------------------------------------------------------------------------------------------------------------------------------------------------------------------------------------------------------------|
| Replay attack end-to-end detection | (Tom et al. 2018)  | Group delay, ResNet-18 (it also includes Global Average Pooling, Fully Connected layers)                                                           | ASVspoof 2017 (Kinnunen et al. 2017)                                                                                                                                                                                                                                                                                                                                | An end-to-end deep learning framework for audio replay attack detection.                                         | EER                                                                     | Outperformed previous related works with Equal Error rate= 0 percent                                                                                                                                                                                                                                                                                                                                                                                     |
| Wavenet                            | (Oord et al. 2016) | Causal Convolutional layers, Dilated Causal Convolutional layers                                                                                   | To measure WaveNet Audio performance: For Multi Speaker Speech Generation: VCTK is used, and the dataset contained 44 hours for 109 speakers. For TTS: The same single-speaker speech databases from which Google's North American English and Mandarin Chinese TTS systems are built. For music audio modelling: the MagnaTagATune and the YouTube piano datasets. | High quality audio deepfake generation in three areas: Speaker Speech Generation, TTS and music audio modelling. | MOS scale for quality                                                   | Generation of raw speech signals with subjective naturalness never before reported in the TTS area. A new architecture based on dilated causal convolutions are developed. When conditioned on a speaker identity, a single model can generate different voices using WaveNet. The architecture of WaveNet gives great results when tested on a small speech recognition dataset. It also is so good in generating other audio modalities such as music. |
| VoCo                               | (Jin et al. 2017)  | Forced alignment algorithm for corpus preparation TTS selection and preparation using MCD metric Building a voice convertor Synthesis and blending | CMU Arctic dataset                                                                                                                                                                                                                                                                                                                                                  | Editing audios using texts. for example to insert a new word for emphasis or replace a misspoken word.           | Mel-Cepstral Distortion (MCD) Euclidean distance, MOS scale for quality | A system is presented that can synthesize a new word or short phrase, replace or insert it in the context of the existing speech                                                                                                                                                                                                                                                                                                                         |

| Name       | Ref                   | Architecture                                                                                                                                                                                 | Dataset                                                                                    | Objectives                                                                                         | Metrics                                   | Results                                                                                                                                                                          |
|------------|-----------------------|----------------------------------------------------------------------------------------------------------------------------------------------------------------------------------------------|--------------------------------------------------------------------------------------------|----------------------------------------------------------------------------------------------------|-------------------------------------------|----------------------------------------------------------------------------------------------------------------------------------------------------------------------------------|
| Tacotron   | (Wang et al. 2017)    | PreNet, Attention RNN, Decoder RNN, CBHG (1-D convolution bank + highway network + bidirectional GRU), Griffin-Lim reconstruction                                                            | an Internal North American English                                                         | An end-to-end generative TTS model that synthesizes speech directly from text (characters)         | Visual Comparisons, MOS scale for quality | An end-to-end generative TTS model that achieved 3.82 subjective 5-scale score on US English.                                                                                    |
| Tacotron 2 | (Shen et al. 2018)    | PreNet, three convolutional layers, bidirectional LSTM, attention, 2 LSTM layers (recurrent sequence-to-sequence feature prediction network ), Linear Projection, Modified WaveNet as vocode | an Internal US English Dataset                                                             | A NN architecture for speech synthesis directly from text.                                         | MOS scale for quality                     | MOS = 4.53 comparable with MOS= 4.58 that is assigned to a professionally recorded speech.                                                                                       |
| Wave Glow  | (Prenger et al. 2019) | It uses only a single network and a single cost function: maximizing the likelihood of the training data                                                                                     | Amazon Mechanical Turk                                                                     | Presenting a "flow-based network capable of generating high quality speech from mel-spectrograms". | MOS scale for quality                     | It produces audio samples at a rate of more than 500 kHz on an NVIDIA V100 GPU. The MOS of it shows that its generated audio is as good as the best public WaveNet audio sample. |
| Char 2Wav  | (Sotelo et al. 2017)  | The Reader: (bidirectional RNN as the encoder, attention-based RNN as decoder) followed by the vocoder ( neural vocoder and sampleRNN).                                                      | For being conditioned on English phonemes and texts is VCTK. For Spanish text is DIMEX-100 | An end-to-end model for speech synthesis                                                           | No metric. Just some samples are given    | Not contain any comprehensive quantitative analysis of the results, but shows some samples and their corresponding alignments to the texts.                                      |

| Name         | Ref                      | Architecture                                                                                                                                                                                                                     | Dataset                                                                                                                         | Objectives                                                                                                                                                                                                                                    | Metrics                                                                                     | Results                                                                                                                                                                                                                                                                                     |
|--------------|--------------------------|----------------------------------------------------------------------------------------------------------------------------------------------------------------------------------------------------------------------------------|---------------------------------------------------------------------------------------------------------------------------------|-----------------------------------------------------------------------------------------------------------------------------------------------------------------------------------------------------------------------------------------------|---------------------------------------------------------------------------------------------|---------------------------------------------------------------------------------------------------------------------------------------------------------------------------------------------------------------------------------------------------------------------------------------------|
| Melnet       | (Vasquez and Lewis 2019) | Entirely recurrent architecture. It has three stacks, respectively: time delayed (Multiple layers of multidimensional RNNs), the optional centralized stack (an RNN), the frequency-delayed stack: (a one-dimensional RNN)       | For unconditional generation: (Blizzard, MAESTRO, VoxCeleb2) For TTS: (TED-LUM3 and Blizzard)                                   | To have a generative network that can capture high-level structure that emerges on the scale of several seconds (subsampling spectrogram) in addition to details and high resolution (an iterative upsampling procedure)                      | Which model generates samples with longer-term structure answered by some human evaluators. | Instead of 1D time domain waveforms, it modelled 2D time-frequency representations such as spectrograms. It enabled fully end-to-end TTS that can generate audio with longer-term structure.                                                                                                |
| Deep Voice 3 | (Ping et al. 2018)       | Encoder: (PreNet, Convolutional Blocks, PostNet), Decoder: (in an autoregressive manner: PreNet, Attention Blocks and Causal Convolutional layers, Fully Connected Layers) then it followed by the convertor and chosen vocoder. | Single-speaker synthesis: an internal US English dataset. Multi-speaker synthesis: VCTK and LibriSpeech (Panayotov et al. 2015) | A new high-quality framework (A fully convolutional attention based neural) for TTS. The common error modes of attention-based speech synthesis networks and ways to mitigate them. Comparing some waveform synthesis models with each other. | Training iteration and achieving convergence time, MOS scale for quality                    | It is compared with Tacotron and is really faster in training iteration time and achieving convergence. The achieved range of MOS for single-speaker synthesis: (3.62-3.78) The achieved range of MOS for multiple-speaker synthesis for VCTK: (3.01-3.44). and for LibriSpeech (2.37-2.89) |
| HiFi-GAN     | (Kong et al. 2020)       | Generator (CNN) and two D Discriminators: multi-scale and multi-period. Two losses are added during the training. A Multi-Receptive Field Fusion module is added to the G                                                        | LJSpeech dataset (Ito and Johnson, 2017)                                                                                        | Proposing a framework for efficient and high fidelity speech synthesis based on GAN                                                                                                                                                           | MOS scale for quality                                                                       | It outperformed WaveGlow in the end-to-end setting and some other frameworks, but the quality of the ground truth is still better.                                                                                                                                                          |

| Name         | Ref                    | Architecture                                                                                                                                                                                               | Dataset                                                               | Objectives                                                | Metrics                                   | Results                                                                                                                                                                                                                                                                                       |
|--------------|------------------------|------------------------------------------------------------------------------------------------------------------------------------------------------------------------------------------------------------|-----------------------------------------------------------------------|-----------------------------------------------------------|-------------------------------------------|-----------------------------------------------------------------------------------------------------------------------------------------------------------------------------------------------------------------------------------------------------------------------------------------------|
| MelGAN       | (Kumar et al., 2019)   | GAN-based: G: (Convolutional layer, Upsampling layers, Residual Stacks with dilated convolutional block) . D: ( Each discriminator block contains Downsampling layer as well as some convolutional layers) | LJSpeech dataset (Ito and Johnson, 2017)                              | Using GAN for producing high quality coherent waveforms ) | Number of parameters, Speed (in kHz), MOS | Its pytorch implementation ran more than 2 times faster in real time on a CPU and 100x faster than realtime on a GTX 1080 Ti GPU, with no hardware specific optimization trick. It is comparable in quality to state-of-the-art high capacity WaveNet-based models, but not better than them. |
| Cycle GAN-VC | (Fang et al., 2018)    | Extracting two types of features of speech: The mel-cepstrum, (fundamental frequency) and aperiodicity bands. They are converted separately. GAN and linear conversion.                                    | ALAGIN Japanese Speech Database                                       | A nonparallel VC method                                   | MOS scale for quality and similarity      | Outperformed Merlin-based baseline (parallel VC) significantly. Slightly better than the state-of-the-art GAN-based parallel VC method                                                                                                                                                        |
| Start GAN-VC | (Kameoka et al., 2018) | Extracting two types of features of speech: The mel-cepstrum, (fundamental frequency) and aperiodicity bands. They are converted separately. GAN and linear conversion                                     | ALAGIN Japanese Speech Database                                       | A nonparallel VC method                                   | MOS scale for quality and similarity      | Outperformed Merlin-based baseline (parallel VC) significantly. Slightly better than the state-of-the-art GAN-based parallel VC method.                                                                                                                                                       |
| SIN GAN      | (Sisman et al., 2019)  | In the training phase WORLD vocoder is used. The run-time phase includes WORLD vocoder, GAN and another WORLD vocoder.                                                                                     | NUS Sung and Spoken LyricsCorpus (NUS-48E corpus) (Duan et al., 2013) | Using GAN for SVC (Singing Voice Conversion)              | MOS, Preference score                     | Outperformed the DNN-based traditional SVC model.                                                                                                                                                                                                                                             |

| Name                                    | Ref                 | Architecture                                                                                                                                                                                                                                                                                                                        | Dataset                                                                                                                                                                           | Objectives                                                                     | Metrics                                                                                          | Results                                                                                      |
|-----------------------------------------|---------------------|-------------------------------------------------------------------------------------------------------------------------------------------------------------------------------------------------------------------------------------------------------------------------------------------------------------------------------------|-----------------------------------------------------------------------------------------------------------------------------------------------------------------------------------|--------------------------------------------------------------------------------|--------------------------------------------------------------------------------------------------|----------------------------------------------------------------------------------------------|
| GAN for Impersonation                   | (Gao et al. 2018)   | GANs for style transfer, GANs for voice mimicry. The generative network: (6-layer CNN encoder and transposed 6-layer CNN). The discriminative network (7 layer CNN with adaptive pooling.)                                                                                                                                          | TIDIGITS                                                                                                                                                                          | Presenting GAN-based model for voice impersonation                             | The signal-to-noise (SNR) ratio test using the standard NIST STNR method and the WADA SNR method | The WADA test results are around 100 db. The STNR shows the generated data has good quality. |
| A spoof detection system (ResNet-based) | (Chen et al. 2020a) | The input of the ResNet is 60-dimensional linear filter banks (LFBs) that are extracted from raw audio. In the training phase FreqAugmentlayer and large margin cosine loss are used; same training utterances are fed into ResNet to extract spoof embeddings. They are utilized to train the backend genuine-vs-spoof classifier. | 1) ASVspoof 2019 logical access (LA)dataset. 2) A noisy version of the ASVspoof 2019 dataset. 3) A copy of the dataset that is logically replayed through the telephony channel . | Proposing a spoof detection system that overcomes the generalization challenge | EER                                                                                              | Reduced ERR significantly (from 4.04 percent to 1.26 percent)                                |
| A spoof detection system (ResNet-based) | (Chen et al. 2017)  | Features: Constant Q Cepstral Coefficients and Mel Frequency Cepstral Coefficients<br>Classifiers: Gaussian Mixture Models, DNN and ResNet                                                                                                                                                                                          | ASVspoof2017 (Kinnunen et al. 2017) dataset                                                                                                                                       | Using ResNet for automatic audio spoofing detection                            | EER                                                                                              | Outperformed the best single-model system by reducing EER 18 percent relatively.             |

| Name                                                          | Ref                   | Architecture                                                                     | Dataset                                                                               | Objectives                                                                                                                               | Metrics                        | Results                                                                                                                   |
|---------------------------------------------------------------|-----------------------|----------------------------------------------------------------------------------|---------------------------------------------------------------------------------------|------------------------------------------------------------------------------------------------------------------------------------------|--------------------------------|---------------------------------------------------------------------------------------------------------------------------|
| One-Class Learning Towards Synthetic Voice Spoofing Detection | (Zhang et al., 2021b) | It has proposed the OC-Softmax loss function to solve the generalization problem | The development and evaluation sets of ASVspoof2019 Challenge logical access scenario | To detect unseen voice spoofing attacks using one-class learning, and solve the generalization problem of the previous detection methods | EER, countermeasure (CM) score | It has achieved an EER of 2.19 percent, and outperformed all existing single systems (i.e., those without model ensemble) |
